# Supplementary material
Source: PubMed Central journal article supplement (PMC2395006)
Supplement: supp_190_10_3588__1.pdf [file supp_190_10_3588__1.pdf]

**Table S2***Transcripts decreased in abundance in  $\Delta$ hrtA grown in heme<sup>a</sup>*

| Carbohydrate transport and metabolism <sup>b</sup> |                  |                        |                                                   |
|----------------------------------------------------|------------------|------------------------|---------------------------------------------------|
| Locus <sup>c</sup>                                 | Decrease in heme | Gene Name <sup>d</sup> | Description                                       |
| SACOL0312                                          | 2.9              | <i>nanA</i>            | N-acetylneuraminate lyase                         |
| SACOL0200                                          | 15.0             |                        | phosphoglycerate transporter family protein       |
| SACOL0407                                          | 2.9              | <i>glpT</i>            | glycerol-3-phosphate transporter                  |
| Cell wall/membrane biogenesis                      |                  |                        |                                                   |
| Locus                                              | Decrease in heme | Gene Name              | Description                                       |
| SACOL1659                                          | 3.9              |                        | conserved hypothetical protein                    |
| SACOL2578                                          | 16.1             |                        | glycosyl transferase, group 2 family protein      |
| Inorganic ion transport and metabolism             |                  |                        |                                                   |
| Locus                                              | Decrease in heme | Gene Name              | Description                                       |
| SACOL2176                                          | 8.0              | <i>opuD</i>            | osmoprotectant transporter, BCCT family           |
| N.D.                                               |                  |                        |                                                   |
| Locus                                              | Decrease in heme | Gene Name              | Description                                       |
| SACOL0085                                          | 3.7              |                        | peptidase, M20/M25/M40 family                     |
| SACOL0178                                          | 15.6             |                        | PTS system, IIBC components                       |
| SACOL2197                                          | 47.3             |                        | surface protein, putative                         |
| SACOL2621                                          | 16.6             |                        | hypothetical protein                              |
| Resistance                                         |                  |                        |                                                   |
| Locus                                              | Decrease in heme | Gene Name              | Description                                       |
| SACOL0050                                          | 2.8              | <i>pls</i>             | homology to methicillin-resistant surface protein |
| Transcription                                      |                  |                        |                                                   |
| Locus                                              | Decrease in heme | Gene Name              | Description                                       |
| SACOL0403                                          | 21.5             |                        | transcriptional antiterminator, BglG family       |
| Virulence                                          |                  |                        |                                                   |
| Locus                                              | Decrease in heme | Gene Name              | Description                                       |
| SACOL0137                                          | 11.5             | <i>cap5B</i>           | capsular polysaccharide biosynthesis protein      |
| SACOL0138                                          | 11.2             | <i>cap5C</i>           | capsular polysaccharide biosynthesis protein      |
| SACOL0143                                          | 8.3              | <i>cap5H</i>           | capsular polysaccharide biosynthesis protein      |
| SACOL1637                                          | 42.1             | <i>lukD</i>            | leukotoxin <i>lukD</i>                            |
| SACOL1865                                          | <b>20.8</b>      | <i>splE</i>            | serine protease <i>splE</i>                       |
| SACOL1866                                          | <b>22.2</b>      | <i>splD</i>            | serine protease <i>splD</i>                       |
| SACOL1867                                          | <b>9.1</b>       | <i>splC</i>            | serine protease <i>splC</i>                       |
| SACOL1872                                          | 12.3             | <i>epiE</i>            | epidermin immunity protein F                      |
| SACOL1873                                          | 17.3             | <i>epiF</i>            | epidermin immunity protein F                      |
| SACOL2007                                          | 8.7              |                        | peptidase, M20/M25/M40 family                     |
| SACOL2419                                          | 52.8             | <i>hlgA</i>            | gamma-hemolysin, component A                      |
| SACOL2421                                          | 80.9             | <i>hlgC</i>            | gamma hemolysin, component C                      |
| SACOL2422                                          | 42.4             | <i>hlgB</i>            | gamma hemolysin, component B                      |

<sup>a</sup> All transcripts with at least 2-fold changes in  $\Delta$ hrtA + heme compared to  $\Delta$ hrtA alone which are statistically significant are shown. Grey boxes indicate that in  $\Delta$ hrtA alone, transcript abundance approaches the lower limit of sensitivity and thus values may not be accurate. Bold, italicized values indicate that in  $\Delta$ hrtA alone, no transcript was detected and thus values may not be accurate.

<sup>b</sup> Predicted functions are assigned according to COG annotation and/or gene name

<sup>c</sup> All genes with SACOL designation are from *S. aureus* strain COL (SACOL)

<sup>d</sup> Transcripts with no gene name have no designated name in the *S. aureus* COL genome annotation
